# Supplementary material for: Analysis of urinary metabolomic profiling for unstable angina pectoris disease based on nuclear magnetic resonance spectroscopy
Source: Royal Society of Chemistry journal article supplement (doi:10.1039/c5mb00489f), 2015-10-12
Supplement: c5mb00489f1.pdf [file c5mb00489f1.pdf]

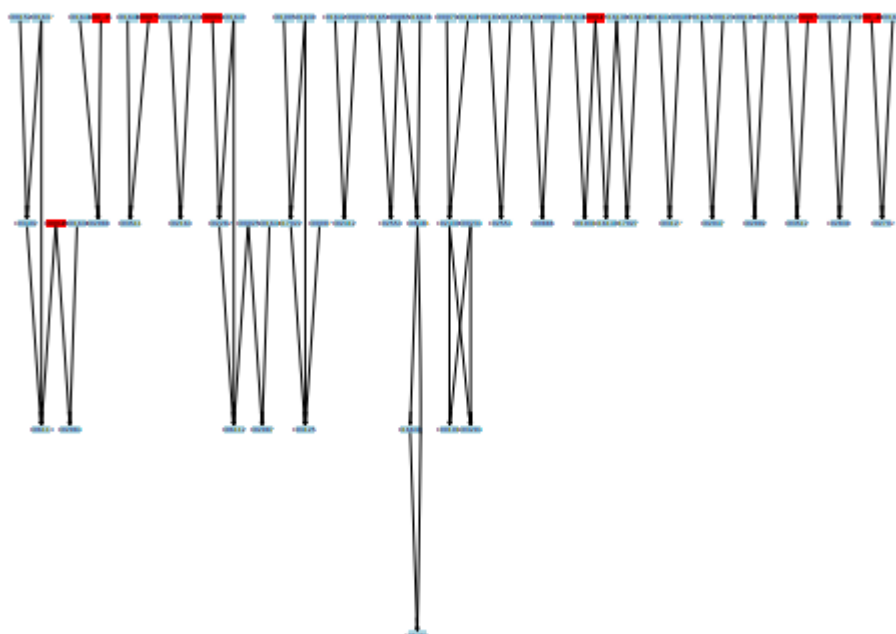

Figure S1, the pathways of Aminoacyl-tRNA biosynthesis

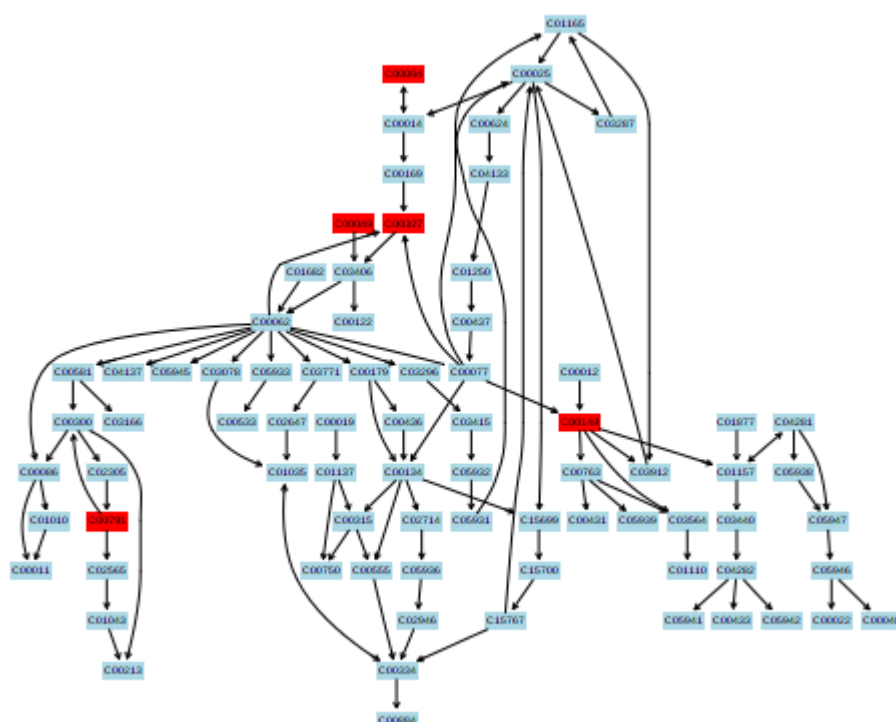

Figure S2, the pathways of Arginine and proline metabolism

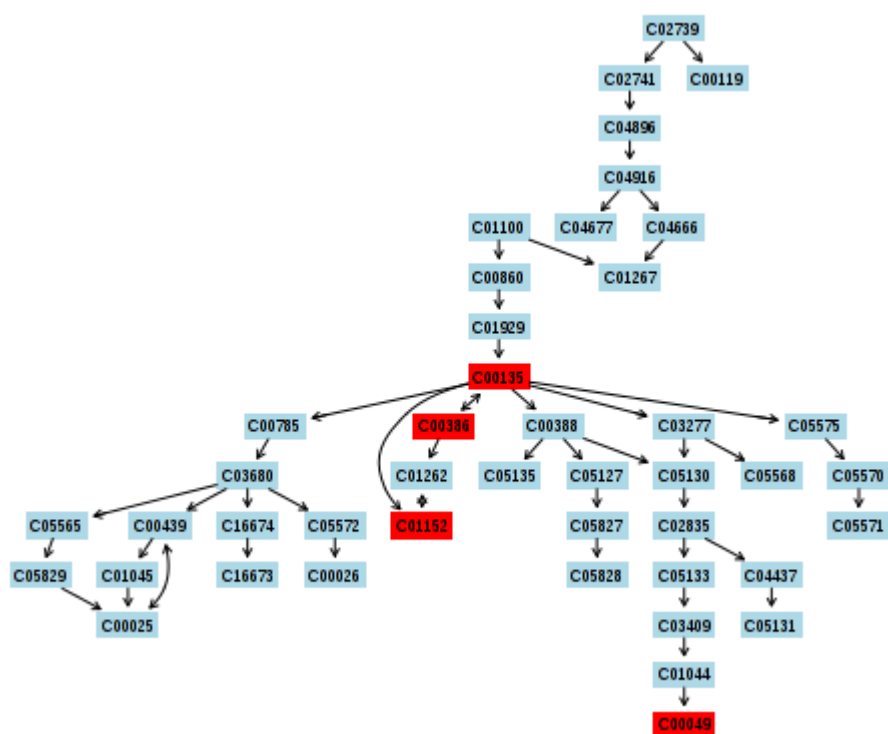

Figure S3, the pathways of Histidine metabolism

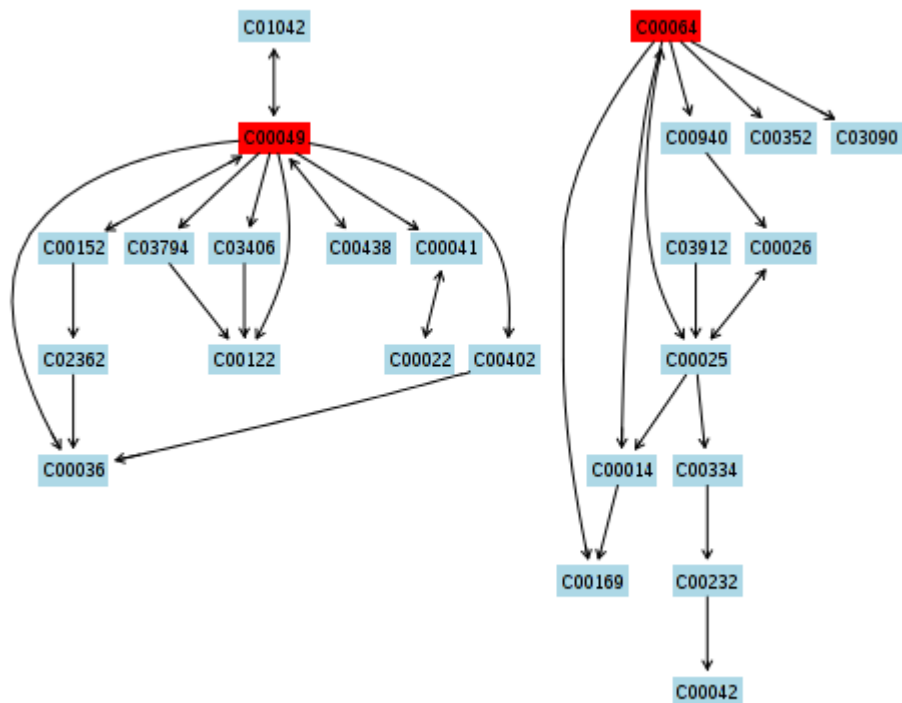

Figure S4, the pathways of Alanine, aspartate and glutamate metabolism

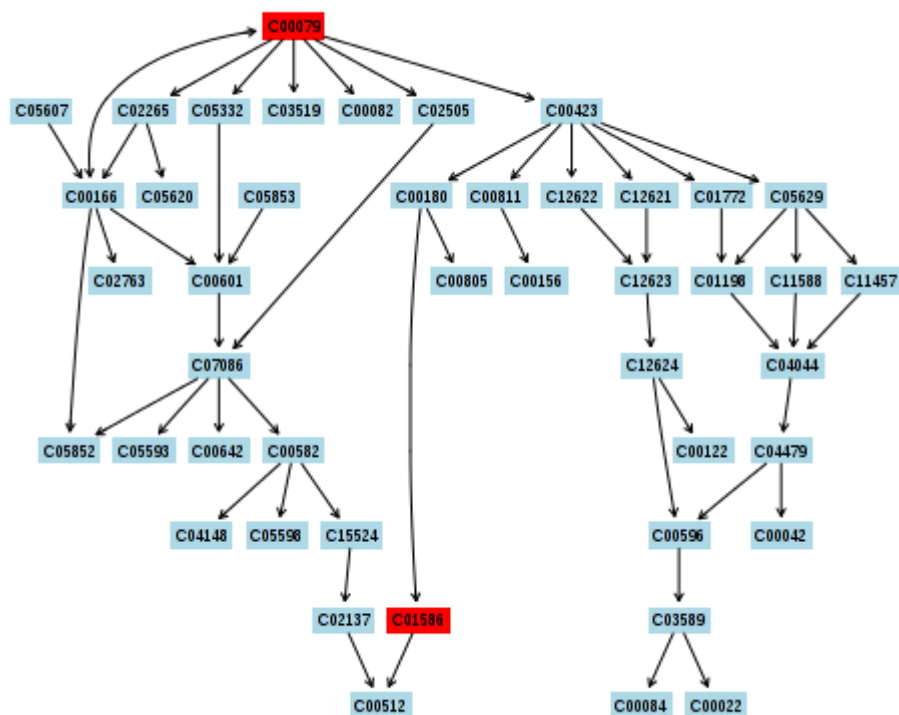

Figure S5, the pathways of Phenylalanine metabolism;

Table S1 Results from Pathway Analysis with MetPA from urine

| Pathway Name                                   | Total<br>compound | Expected | Hits | Raw p   | Holm p  | FDR     | impact  | metabolites                                                                    |
|------------------------------------------------|-------------------|----------|------|---------|---------|---------|---------|--------------------------------------------------------------------------------|
| Aminoacyl-tRNA biosynthesis                    | 75                | 0.59202  | 7    | 8.04E-7 | 6.43E-5 | 6.43E-5 | 0.11268 | Histidine, Phenylalanine, Glutamine, Aspartate, Lysine,<br>Tryptophan, Proline |
| Arginine and proline metabolism                | 77                | 0.60781  | 5    | 2.41E-4 | 1.88E-2 | 6.17E-3 | 0.12873 | Glutamine, Aspartate, Citrulline, Creatinine, Proline                          |
| Histidine metabolism                           | 44                | 0.34732  | 4    | 3.09E-4 | 2.38E-2 | 6.17E-3 | 0.14828 | Histidine, Carnosine, Methylhistidine, Aspartate                               |
| Alanine, aspartate and glutamate<br>metabolism | 24                | 0.18945  | 2    | 1.47E-2 | 1.0     | 0.147   | 0.47199 | Aspartate, Glutamine                                                           |
| Phenylalanine metabolism                       | 45                | 0.35521  | 2    | 4.78E-2 | 1.0     | 0.319   | 0.15056 | Phenylalanine, Hippurate                                                       |
| Lysine degradation                             | 47                | 0.371    | 1    | 0.313   | 1.0     | 1.0     | 0.14675 | lysine                                                                         |
| Tryptophan metabolism                          | 79                | 0.6236   | 1    | 0.471   | 1.0     | 1.0     | 0.10853 | tryptophan                                                                     |

Total is the total number of compounds in the pathway; the hits is the actually matched number from the user uploaded data; the raw p is the original p value calculated from the enrichment analysis; the impact is the pathway impact value calculated from pathway topology analysis.
